# Supplementary material for: Developmental alterations in centrosome integrity contribute to the post-mitotic state of mammalian cardiomyocytes
Source: eLife journal article supplement (doi:10.7554/elife.05563), 2015-08-06

# Zebrowski DC *et al.*, Figure 2 - figure supplement 1

## Loss of centrosome function during heart development

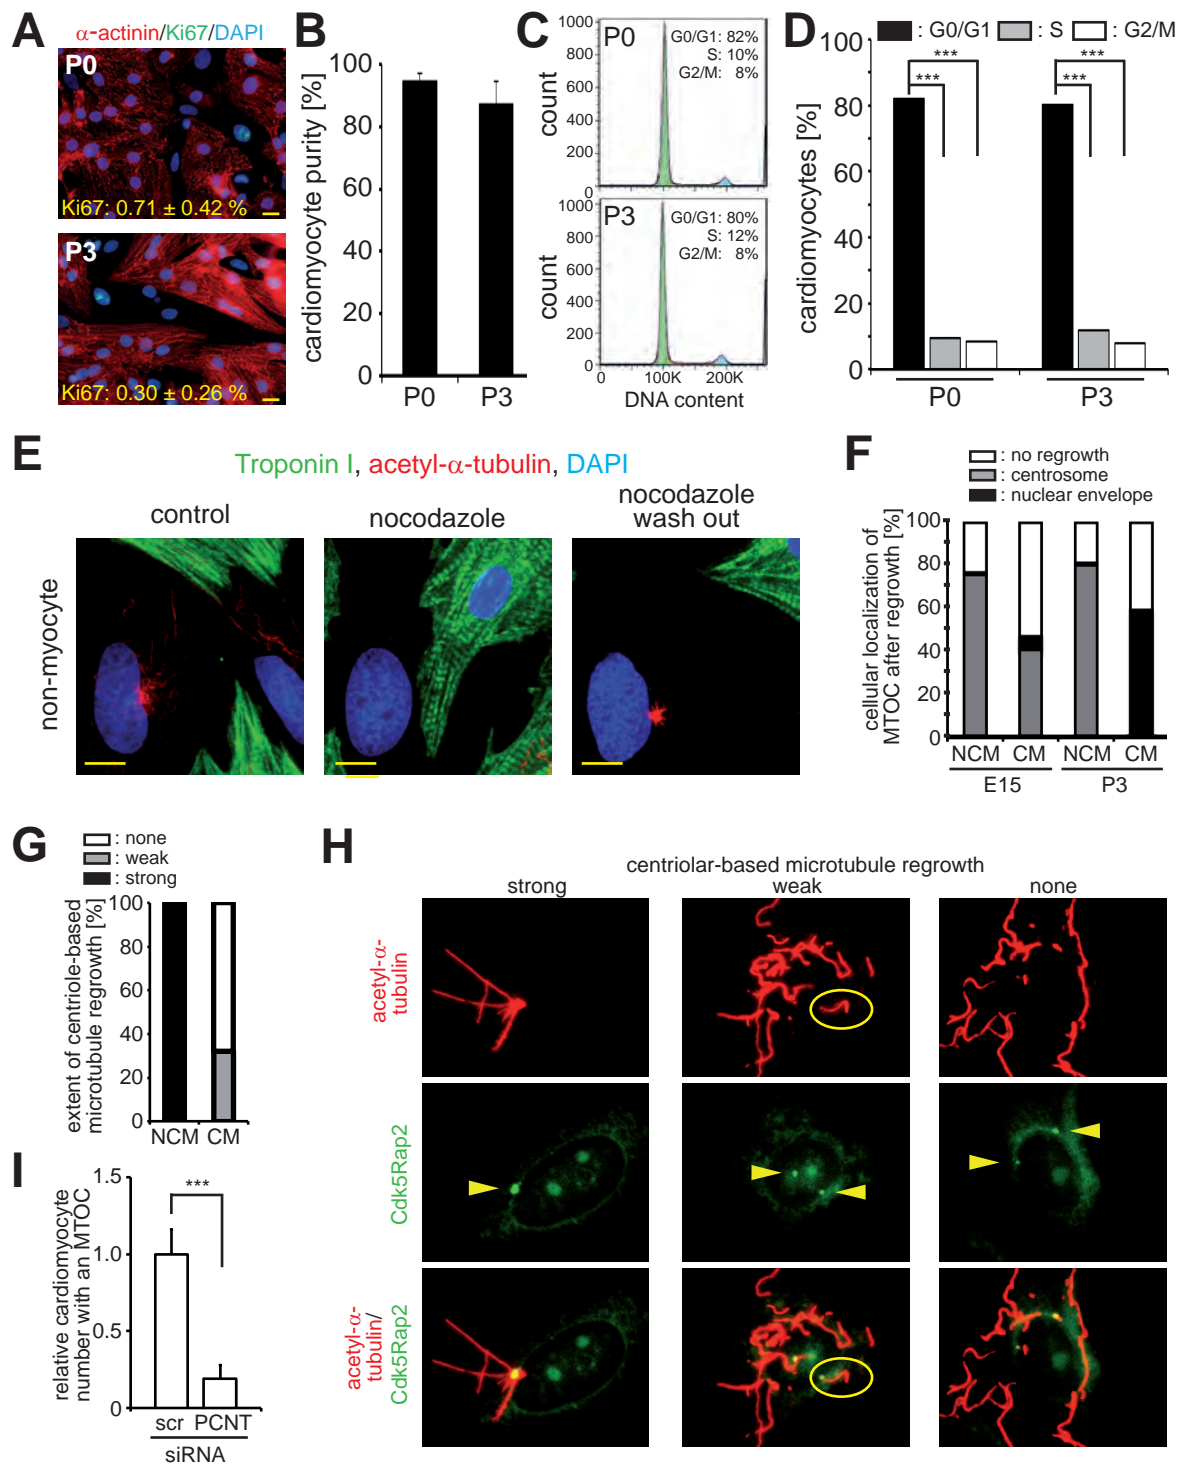

Supplement: supp [file elife_poa_e05563_Figure_2_figure_supplement_1.pdf › elife_poa_e05563_Figure_2_figure_supplement_1.pdf]
